# Supplementary material for: Novel Sterically Crowded and Conformationally Constrained α-Aminophosphonates with a Near-Neutral pKa as Highly Accurate 31P NMR pH Probes. Application to Subtle pH Gradients Determination in Dictyostelium discoideum Cells
Source: MDPI journal article supplement (doi:10.3390/molecules27144506), 2022-07-14
Supplement: s1 [file s1]

## Supplementary Materials

# Novel Sterically Crowded and Conformationally Constrained $\alpha$ -Aminophosphonates with a Near-Neutral $pK_a$ as Highly Accurate $^{31}\text{P}$ NMR pH Probes. Application to Subtle pH Gradients Determination in *Dictyostelium discoideum* Cells

Caroline Delehedde <sup>1</sup>, Marcel Culcasi <sup>1</sup>, Emilie Ricquebourg <sup>1</sup>, Mathieu Cassien <sup>2</sup>,

Didier Siri <sup>3</sup>, Bruno Blaive <sup>1</sup>, Sylvia Pietri <sup>1</sup> and Sophie Thétiot-Laurent <sup>1,\*</sup>

<sup>1</sup> Aix Marseille Univ, CNRS, ICR, UMR 7273, SMBSO, 13397 Marseille, France

<sup>2</sup> Yelen Analytics, 10 Boulevard Tempête, 13820 Ensues-la-Redonne, France

<sup>3</sup> Aix Marseille Univ, CNRS, ICR, UMR 7273, CT, 13397 Marseille, France

### Corresponding Author

S. Thétiot-Laurent, Ph.D.

Aix Marseille Univ, CNRS, ICR UMR 7273, Institut de Chimie Radicalaire

Sondes Moléculaires en Biologie et Stress Oxydant, Service 522

Faculté des Sciences de Saint-Jérôme, Avenue Escadrille Normandie-Niemen

13397 Marseille Cedex 20 - France

Tel: +33-(0)4-13-94-58-07; Fax: +33-(0)4-91-28-87-58

[sophie.thetiot-laurent@univ-amu.fr](mailto:sophie.thetiot-laurent@univ-amu.fr)

### Table of contents

|                                |    |
|--------------------------------|----|
| Table S1 .....                 | S2 |
| Table S2 .....                 | S5 |
| Supplementary References ..... | S6 |

**Table S1.**  $pK_a$  and  $\Delta\delta_{ab}$  (absolute value of the difference between limiting chemical shift of the protonated and unprotonated form) values in Krebs-Henseleit (KH) medium reported in the literature for various aminophosphorylated compounds.

| Compound                                                                          | Position of substituent                                                              | $pK_a$ | $\Delta\delta_{ab}$ (ppm) | Ref. |
|-----------------------------------------------------------------------------------|--------------------------------------------------------------------------------------|--------|---------------------------|------|
| <b>Linear <math>\alpha</math>-aminophosphonates (LAP)</b>                         |                                                                                      |        |                           |      |
| 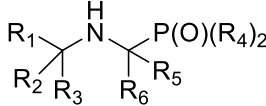 |                                                                                      |        |                           |      |
| LAP-1                                                                             | $R_1 = R_2 = H$ ; $R_3 = Et$ ; $R_4 = OEt$ ; $R_5 = R_6 = Me$                        | 6.99   | 10.17                     | [19] |
| LAP-2                                                                             | $R_1 = R_2 = H$ ; $R_3 = Et$ ; $R_4 = OEt$ ; $R_5 = Me$ ; $R_6 = 4-NO_2Ph$           | 5.03   | 8.02                      | [19] |
| LAP-3                                                                             | $R_1 = R_2 = H$ ; $R_3 = Et$ ; $R_4 = OEt$ ; $R_5 = Me$ ; $R_6 = Ph$                 | 5.89   | 8.19                      | [28] |
| LAP-4                                                                             | $R_1 = R_2 = H$ ; $R_3 = Ph$ ; $R_4 = OEt$ ; $R_5 = Me$ ; $R_6 = Ph$                 | 4.76   | 8.14                      | [29] |
| LAP-5                                                                             | $R_1 = R_2 = H$ ; $R_3 = n-Pr$ ; $R_4 = OEt$ ; $R_5 = Me$ ; $R_6 = H$                | 6.92   | 10.17                     | [28] |
| LAP-6                                                                             | $R_1 = R_2 = Me$ ; $R_3 = CH_2OH$ ; $R_4 = OEt$ ; $R_5 = Me$ ; $R_6 = H$             | 5.66   | 10.01                     | [28] |
| LAP-7                                                                             | $R_1 = R_2 = R_3 = Me$ ; $R_4 = OEt$ ; $R_5 = Me$ ; $R_6 = H$                        | 7.02   | 10.29                     | [28] |
| LAP-8                                                                             | $R_1 = R_2 = R_3 = Me$ ; $R_4 = OEt$ ; $R_5 = iPr$ ; $R_6 = H$                       | 6.61   | 10.94                     | [19] |
| LAP-9                                                                             | $R_1 = R_2 = R_3 = Me$ ; $R_4 = OEt$ ; $R_5 = tBu$ ; $R_6 = H$                       | 6.35   | 10.36                     | [43] |
| LAP-10                                                                            | $R_1 = H$ ; $R_2, R_3 = cyclohexyl$ ; $R_4 = OEt$ ; $R_5, R_6 = cyclohexyl$          | 6.29   | 10.18                     | [43] |
| LAP-11                                                                            | $R_1 = R_2 = R_3 = Me$ ; $R_4 = Me$ ; $R_5 = tBu$ ; $R_6 = H$                        | 6.22   | 6.94                      | [43] |
| LAP-12                                                                            | $R_1 = R_2 = R_3 = Me$ ; $R_4 = OEt$ ; $R_5 = P(O)(OEt)_2$ ; $R_6 = Me$              | 3.45   | 7.55                      | [30] |
| LAP-13                                                                            | $R_1 = R_2 = R_3 = Me$ ; $R_4 = OEt$ ; $R_5 = P(O)(OEt)_2$ ; $R_6 = H$               | 3.22   | 8.18                      | [19] |
| LAP-14                                                                            | $R_1 = Me$ ; $R_2 = H$ ; $R_3 = Et$ ; $R_4 = OEt$ ; $R_5 = P(O)(OEt)_2$ ; $R_6 = Me$ | 3.63   | 7.66                      | [30] |
| LAP-15                                                                            | $R_1 = R_2 = R_3 = Me$ ; $R_4 = OEt$ ; $R_5 = 2-Py$ ; $R_6 = H$                      | 5.32   | 9.12                      | [45] |
| LAP-16                                                                            | $R_1 = R_2 = H$ ; $R_3 = Ph$ ; $R_4 = OEt$ ; $R_5 = P(O)(OEt)_2$ ; $R_6 = Et$        | 2.48   | 7.67                      | [30] |
| LAP-17                                                                            | $R_1 = R_2 = Me$ ; $R_3 = H$ ; $R_4 = OEt$ ; $R_5, R_6 = cyclohexyl$                 | 6.35   | 10.18                     | [19] |
| LAP-18                                                                            | $R_1 = Me$ ; $R_2 = H$ ; $R_3 = CO_2Me$ ; $R_4 = OEt$ ; $R_5 = R_6 = Me$             | 3.63   | 10.38                     | [31] |
| LAP-19                                                                            | $R_1 = Ph$ ; $R_2 = H$ ; $R_3 = CO_2Me$ ; $R_4 = OEt$ ; $R_5 = R_6 = Me$             | 2.60   | 10.37                     | [31] |
| LAP-20                                                                            | $R_1 = iPr$ ; $R_2 = H$ ; $R_3 = CO_2Me$ ; $R_4 = OEt$ ; $R_5 = R_6 = Me$            | 3.35   | 10.55                     | [31] |
| LAP-21                                                                            | $R_1 = R_2 = Me$ ; $R_3 = CO_2Et$ ; $R_4 = OEt$ ; $R_5 = tBu$ ; $R_6 = H$            | 2.39   | 10.54                     | [31] |
| LAP-22                                                                            | $R_1 = R_2 = Me$ ; $R_3 = CO_2Et$ ; $R_4 = OEt$ ; $R_5 = iPr$ ; $R_6 = H$            | 2.99   | 10.18                     | [31] |

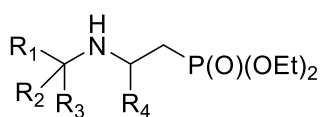

|        |                                           |      |      |      |
|--------|-------------------------------------------|------|------|------|
| LAP-23 | $R_1 = R_2 = H$ ; $R_3 = Et$ ; $R_4 = Me$ | 9.05 | 5.31 | [19] |
|--------|-------------------------------------------|------|------|------|

**Table S1.** (continued)

|        |                                                                                   |      |       |      |
|--------|-----------------------------------------------------------------------------------|------|-------|------|
|        | 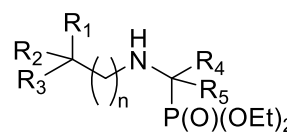 |      |       |      |
| LAP-24 | $R_1 = R_2 = H; R_3 = PPh_3.Br; R_4 = H; R_5 = iPr; n = 3$                        | 5.47 | 10.54 | [32] |
| LAP-25 | $R_1 = R_2 = H; R_3 = PPh_3.Br; R_4 = H; R_5 = iPr; n = 5$                        | 5.99 | 10.65 | [32] |
| LAP-26 | $R_1 = R_2 = H; R_3 = PPh_3.Br; R_4 = H; R_5 = iPr; n = 7$                        | 6.23 | 10.73 | [32] |
| LAP-27 | $R_1 = R_2 = H; R_3 = PPh_3.Br; R_4 = H; R_5 = iPr; n = 11$                       | 6.38 | 10.28 | [32] |
| LAP-28 | $R_1 = R_2 = H; R_3 = PPh_3.Br; R_4 = R_5 = Me; n = 3$                            | 5.90 | 9.92  | [32] |
| LAP-29 | $R_1 = R_2 = H; R_3 = PPh_3.Br; R_4 = R_5 = Me; n = 5$                            | 6.53 | 10.00 | [32] |
| LAP-30 | $R_1 = R_2 = H; R_3 = PPh_3.Br; R_4 = R_5 = Me; n = 7$                            | 6.94 | 10.23 | [32] |
| LAP-31 | $R_1 = R_2 = H; R_3 = PPh_3.Br; R_4 = R_5 = Me; n = 11$                           | 6.85 | 10.12 | [32] |
| LAP-32 | $R_1 = R_2 = H; R_3 = PPh_3.Br; R_4 = tBu; R_5 = H; n = 5$                        | 5.63 | 10.27 | [32] |

|                                                                                   |                                                   |      |      |      |
|-----------------------------------------------------------------------------------|---------------------------------------------------|------|------|------|
|  |                                                   |      |      |      |
| LAP-33                                                                            | R <sub>1</sub> = H; R <sub>2</sub> = Me           | 5.13 | 9.38 | [32] |
| LAP-34                                                                            | R <sub>1</sub> = <i>i</i> Bu; R <sub>2</sub> = Me | 5.39 | 9.84 | [32] |

### Cyclic $\alpha$ -aminophosphonates (CAP)

|                                                                                     |                                                               |                   |       |      |  |
|-------------------------------------------------------------------------------------|---------------------------------------------------------------|-------------------|-------|------|--|
| 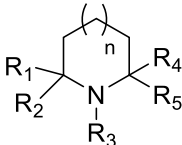 |                                                               |                   |       |      |  |
| CAP-1                                                                               | $R_1 = R_2 = H; R_3 = R_4 = Me; R_5 = P(O)(OEt)_2; n = 0$     | 6.47              | 9.80  | [28] |  |
| CAP-2                                                                               | $R_1 = R_2 = R_3 = H; R_4 = Me; R_5 = P(O)(CH_3)(OEt); n = 0$ | 6.64 <sup>a</sup> | 8.32  | [19] |  |
|                                                                                     |                                                               | 6.65 <sup>a</sup> | 8.49  | [19] |  |
| CAP-3                                                                               | $R_1 = R_2 = R_3 = H; R_4 = Ph; R_5 = P(O)(OEt)_2; n = 0$     | 5.81              | 8.76  | [19] |  |
| CAP-4                                                                               | $R_1 = R_2 = R_3 = H; R_4 = R_5 = P(O)(OEt)_2; n = 0$         | 3.59              | 7.58  | [19] |  |
| CAP-5                                                                               | $R_1 = R_2 = R_3 = H; R_4 = R_5 = P(O)(OiPr)_2; n = 0$        | 3.98              | 8.05  | [19] |  |
| CAP-6                                                                               | $R_1 = R_2 = R_3 = H; R_4 = R_5 = P(O)(OnBu)_2; n = 0$        | 3.44              | 7.51  | [30] |  |
| CAP-7                                                                               | $R_1 = R_5 = Me; R_2=R_4 = P(O)(OEt)_2; R_3 = H =; n = 0$     | 2.42 <sup>b</sup> | 10.30 | [19] |  |
| CAP-8                                                                               | $R_1 = R_5 = Me; R_2=R_4 = P(O)(OEt)_2; R_3 = H =; n = 0$     | 1.31 <sup>c</sup> | 8.70  | [19] |  |

**Table S1.** (continued)

|        |                                                         |      |      |      |
|--------|---------------------------------------------------------|------|------|------|
| CAP-9  | $R_1 = R_2 = H; R_3 = Me; R_4=R_5 = P(O)(OEt)_2; n = 0$ | 3.63 | 7.60 | [28] |
| CAP-10 | $R_1 = R_2 = H; R_3 = H; R_4=R_5 = P(O)(OEt)_2; n = 1$  | 4.05 | 7.84 | [45] |

### Aminophosphonic acids (APA)

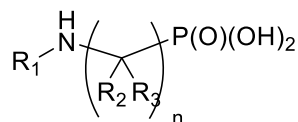

|       |                                  |                    |       |      |
|-------|----------------------------------|--------------------|-------|------|
| APA-1 | $R_1 = R_2 = R_3 = H; n = 1$     | 5.47 <sup>d</sup>  | 1.90  | [22] |
|       |                                  | 10.16 <sup>e</sup> | 10.06 | [22] |
| APA-2 | $R_1 = R_2 = R_3 = H; n = 2$     | 6.31 <sup>d</sup>  | 2.44  | [22] |
|       |                                  | 11.05 <sup>e</sup> | 3.51  | [22] |
| APA-3 | $R_1 = R_2 = H; R_3 = Me; n = 1$ | 5.76 <sup>d</sup>  | 1.75  | [22] |
|       |                                  | 10.25 <sup>e</sup> | 9.88  | [22] |
| APA-4 | $R_1 = Et; n = 0$                | 5.76 <sup>d</sup>  | 1.64  | [22] |
|       |                                  | 10.30 <sup>e</sup> | 9.75  | [22] |
| APA-5 | $R_1 = R_2 = R_3 = H; n = 3$     | 6.99 <sup>d</sup>  | 3.37  | [22] |
|       |                                  | 11.03 <sup>e</sup> | 2.30  | [22] |

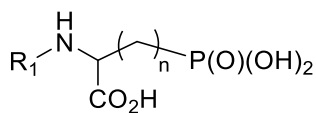

|       |                  |                    |      |      |
|-------|------------------|--------------------|------|------|
| APA-6 | $R_1 = H; n = 1$ | 6.15 <sup>d</sup>  | 2.17 | [22] |
|       |                  | 10.55 <sup>e</sup> | 2.49 | [22] |
| APA-7 | $R_1 = H; n = 2$ | 6.85 <sup>d</sup>  | 2.46 | [22] |
|       |                  | 10.69 <sup>e</sup> | 2.82 | [22] |

<sup>a</sup>undetermined diastereomers; <sup>b</sup>*trans*-isomer; <sup>c</sup>*cis*-isomer; <sup>d</sup>pK<sub>a2</sub> of the second OH; <sup>e</sup>pK<sub>a3</sub> of amine.

All titrations were carried out at 22 °C in modified KH medium (pH 7.35), consisting of (in mM): KH<sub>2</sub>PO<sub>4</sub>, 1.2; MgSO<sub>4</sub>, 1.2; NaCl, 118.5; KCl, 4.8; NaHCO<sub>3</sub>, 25, and EDTA, 0.55 dissolved in doubly distilled deionized water.

**Table S2.** Substituents Types and Increments  $a_i$  for  $pK_a$  Calculation Using:  $pK_a = a_0 + (\sum a_i \times m_i)$  (Equation 1 in main text)

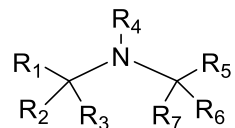

|                                |        | On the N atom     |                   |              |        | On the two or three alpha carbons |                    |        |                   |                    |        |              |
|--------------------------------|--------|-------------------|-------------------|--------------|--------|-----------------------------------|--------------------|--------|-------------------|--------------------|--------|--------------|
| Substituent type               |        | 1 <sup>st</sup> H | 2 <sup>nd</sup> H | Cyclic alkyl | H      | Alkyl                             | CH <sub>2</sub> OH | Ph     | PhNO <sub>2</sub> | CO <sub>2</sub> Me | P(O)XY | <i>gem</i> P |
| <i>i</i> value                 | 0      | 1                 | 2                 | Reference    | 3      | 4                                 | 5                  | 6      | 7                 | 8                  | 9      | 10           |
| <i>a<sub>i</sub></i> (pH unit) | 11.356 | 0.182             | −0.688            | 0            | −0.111 | −0.091                            | −0.902             | −0.922 | −1.521            | −3.332             | −4.568 | 1.426        |

The contribution  $a_i$  of each substituent  $R_i$  ( $i = 1-7$ ; see general structure in heading) and the constant  $a_0$  were calculated by linear regression analysis of the experimental  $pK_a$  values at 22 °C of the following compounds: **1a-p** (see Scheme 1 in main text), LAP-**1-22**, CAP-**1-10**, APA-**1-5** (Table S1), and 6 dialkylamines (i.e., dimethylamine,  $pK_a = 10.64$ ; diethylamine,  $pK_a = 10.98$ ; diisopropylamine,  $pK_a = 11.05$ ; piperidine,  $pK_a = 11.22$ ; pyrrolidine,  $pK_a = 11.27$ ; tetramethylpiperidine,  $pK_a = 11.72$ ). The cyclic alkyl substituent, like in pyrrolidines, was chosen as the reference and assigned a null coefficient ( $i = 0$ ). The abbreviations used are: P(O)XY, phosphonyl substituent; *gem*P incremental value to be added when a *gem* phosphorylated group is present; Ph, phenyl group. For instance, the set  $\{m_1-m_{10}\}$  is  $\{1, 0, 2, 3, 0, 0, 0, 0, 1, 0\}$  for **1a** (see Figure 1 inset in main text).

The coefficients  $a_0$ – $a_6$  were computed by linear regression of the  $pK_a$  values at 22 °C of 59 aminophosphonates including compounds **1a-p** and the following derivatives reported in the literature (Table S1): linear LAP-**1-22** and cyclic CAP-**1-10** aminophosphonates [19,28–31,43,45],  $\alpha$ -,  $\beta$ - or  $\gamma$ -aminophosphonic derivatives (APA-**1-5**) [22], and six alkylamines (i.e., dimethylamine, diethylamine, diisopropylamine, piperidine, pyrrolidine, tetramethylpiperidine [44]). It is worth noting that compounds bearing one (LAP-**23**, Table S1 [19]) or several (LAP-**24-34**, Table S1 [32]) methylene linkers were omitted from the computation since each probe would have required a coefficient per molecule that could not be associate to semi-empirical calculations. The predictive model fitted to  $y = 0.9735x + 0.1383$ .
